## CORRESPONDENCE

Anesthesiology  
81:789, 1994  
© 1994 American Society of Anesthesiologists, Inc.  
J. B. Lippincott Company, Philadelphia

## Atelectasis during Anesthesia

*To the Editor:*—Recently, Ding and White described a patient in whom lung collapse after induction of anesthesia occurred in a healthy outpatient and further reported that the right mainstem bronchus obstruction secondary to mucous plugging during induction has not been reported previously.<sup>1</sup>

We would like to comment on two points. First, in reviewing the English language literature, we find eight episodes of pulmonary collapse during anesthesia attributable to mucous plugging of the bronchi following tracheal intubation in five reports published after 1942.<sup>2-6</sup> Furthermore, one additional report<sup>7</sup> indicated that the probable cause of atelectasis in five cases during anesthesia was excess mucus in the bronchi. Parenthetically, pulmonary collapse due to nasal discharge, nasopharyngeal tissue, blood, clot, or mucus following nasal tracheal intubation has been reported sporadically. Thus, pulmonary collapse during anesthesia due to mucus is not uncommon.

Second, we would like to comment on the treatment of pulmonary collapse. In the reported case,<sup>1</sup> the authors state that they easily passed a suction catheter through the tracheal tube but were unable to suck out any secretions. We presume that they used a straight-type suction catheter, which would easily pass into the left mainstem bronchus rather than the right mainstem bronchus when marked mediastinal shift to the right developed due to collapse of the right lung.

We developed a technique for blind selective bronchial suctioning in the adult and in infants and children using a curved-tipped catheter with a guide mark<sup>8-11</sup> and have successfully treated pulmonary atelectasis of the middle lobe and lower lobes, during anesthesia and the postoperative period without using fiberoptic bronchoscopy or rigid-type bronchoscopy.<sup>12-14</sup> However, our catheter cannot reach the bronchi of the upper lobes, because of the anatomy of the bronchi of the upper lobes. Therefore, one cannot treat atelectasis or pneumonia of the upper lobes using our technique. We also developed a J-shaped catheter tip and a guide mark for this purpose that has been used to successfully treat atelectasis of the upper lobes.<sup>15,16</sup>

**Yukio Kubota, M.D.**  
**Yoshiro Toyoda, M.D.**  
**Hiroshi Kubota, M.D.**  
Department of Anesthesia

**Keiji Kuwata, M.D., Ph.D.**  
Department of Surgery

Osaka Kohseinenkin Hospital  
4-2-78, Fukushima, Fukushima-ku, Osaka, 553, Japan

**Akira Asada, M.D., Ph.D.**  
Department of Anesthesiology and Intensive Care Medicine

Medical School  
Osaka City University  
1-4-54, Asahimachi, Abeno-Ku, Osaka, 545, Japan

## References

1. Ding Y, White PF: Lung collapse after induction of anesthesia in a healthy outpatient. *ANESTHESIOLOGY* 80:689-690, 1994
2. Peterson MC, Pallin IM: A case of massive atelectasis during anesthesia. *ANESTHESIOLOGY* 3:79-82, 1942
3. Clinical Anesthesia Conference: Massive atelectasis incident to anesthesia. *NY State J Med* 73:1317-1318, 1973
4. Samuels SI, Clark RW: Profound atelectasis during anesthesia. *Anesth Analg* 59:792-795, 1980
5. Shaw IH: Collapse of the lung during hemithyroidectomy. *Anaesthesia* 45:61, 1990
6. Lundy JS: *Clinical Anesthesia: A Manual of Clinical Anesthesiology*. Philadelphia, WB Saunders, 1942, pp 370-380
7. Cassels WH, Rapoport AE: Atelectasis during anesthesia. *ANESTHESIOLOGY* 5:174-181, 1944
8. Kubota Y, Magaribuchi T, Ohara M, Fujita M, Toyoda Y, Asada A, Harioka T: Evaluation of selective bronchial suctioning in the adult. *Crit Care Med* 8:748-749, 1980
9. Kubota Y, Magaribuchi T, Toyoda Y, Murakawa M, Urabe N, Asada A, Fujimori M, Ueda Y, Matsuura H: Selective bronchial suctioning in the adult using a curved-tipped catheter with a guide mark. *Crit Care Med* 10:767-769, 1982
10. Kubota Y, Toyoda Y, Sawada S, Murakawa M: The utility of a handmade curve-tipped catheter on selective left bronchial catheterization. *Crit Care Med* 11:765-766, 1983
11. Kubota Y, Toyoda Y, Kubota H, Sawada S, Ishida H, Murakawa M, Mori K, Tokuda T: Selective-left bronchial suctioning in infants and children. *Crit Care Med* 14:902-903, 1986
12. Kubota Y, Toyoda Y, Kubota H, Asada A: Selective bronchial suctioning. *Chest* 97:1279, 1990
13. Kubota Y, Toyoda Y, Kubota H: Bronchial suction. *Anaesthesia* 45:592, 1990
14. Kubota Y, Toyoda Y, Kubota H, Asada A, Sugiyama K: Treatment of atelectasis with selective bronchial suctioning: I. Use of a curved tipped catheter with a guide mark. *Chest* 99:510-512, 1991
15. Kubota Y, Toyoda Y, Kubota H, Asada A, Ueda Y, Hirota Y: Treatment of atelectasis of upper lung lobes: Selective bronchial suctioning with J-shaped catheter tip and guide mark. *Anaesthesia* 45:842-845, 1990
16. Kubota Y, Toyoda Y, Kubota H, Asada A: Treatment of atelectasis of the right upper lobe with a J-shaped catheter. *Chest* 103:319, 1993

(Accepted for publication June 19, 1994.)
